# Supplementary material for: Polygenic Resilience Modulates the Penetrance of Parkinson Disease Genetic Risk Factors
Source: PubMed Central journal article supplement — Ann Neurol. 2022 Jun 24;92(2):270–8. doi: 10.1002/ana.26416 (PMC9329258; doi:10.1002/ana.26416), 2022-06-24
Supplement: NIHMS1809590-supplement-supinfo.pdf [file NIHMS1809590-supplement-supinfo.pdf]

**Supplementary Table 2.** Demographic and clinical characteristics of the COURAGE-PD cohort.

| Principal Investigators | Country      | Ancestry        | Cases (N)   | Controls (N) | Total (N)    | Female cases (%) | Female controls (%) | Case age at enrolment (mean, SD in years) | Control age at enrolment (mean, SD in years) |
|-------------------------|--------------|-----------------|-------------|--------------|--------------|------------------|---------------------|-------------------------------------------|----------------------------------------------|
| Aasly                   | Norway       | European        | 510         | 509          | 1019         | 40%              | 45.2%               | 77.7(11.6)                                | NA                                           |
| Bardien/Carr            | South Africa | European        | 170         | 85           | 255          | 38.8%            | 43.5%               | 68.7(10.6)                                | 51.1(12.7)                                   |
| Annesi                  | Italy        | European        | 93          | 94           | 187          | 35.5%            | 54.3%               | 66.5(9.0)                                 | 58.2(20.3)                                   |
| Brice                   | France       | European        | 851         | 280          | 1131         | 41.6%            | 43.6%               | 60.7(10.9)                                | 62.4(10.7)                                   |
| Brighina                | Italy        | European        | 48          | 40           | 88           | 20.8%            | 40%                 | 66.3(9.8)                                 | 66.7(5.3)                                    |
| Carmine                 | Sweden       | European        | 286         | 629          | 915          | 38.5%            | 44.8%               | 67.4(10.3)                                | NA                                           |
| Chartier-Harlin         | France       | European        | 370         | 228          | 598          | 45.7%            | 60.1%               | 64.3(9.0)                                 | 59.9(12.6)                                   |
| Deutschlander           | Germany      | European        | 285         | 46           | 331          | 38.2%            | 69.6%               | 69.4(9.9)                                 | 66.0(10.3)                                   |
| Elbaz                   | France       | European        | 455         | 1066         | 1521         | 40.2%            | 40.8%               | 70.1(7.4)                                 | 69.8(7.6)                                    |
| Farrer                  | USA          | European        | 389         | 409          | 798          | 34.4%            | 68.2%               | 67.7(10.3)                                | 69.4(12.4)                                   |
| Ferreira                | Portugal     | European        | 415         | 67           | 482          | 42.9%            | 74.6%               | 69.0(10.1)                                | 47.1(17.8)                                   |
| Gasser/Sharma           | Germany      | European        | 681         | 549          | 1230         | 36.4%            | 56.6%               | 64.9(10.9)                                | 61.9(7.8)                                    |
| Goldwurm                | Italy        | European        | 1391        | 1370         | 2761         | 40.8%            | 66.3%               | 65.8(10.8)                                | 61.9(10.9)                                   |
| Hadjigeorgiou           | Greece       | European        | 283         | 314          | 597          | 51.6%            | 52.9%               | 67.9(10.3)                                | 69.8(8.7)                                    |
| Koks                    | Estonia      | European        | 216         | 170          | 386          | 60.2%            | 58.2%               | 73.0(8.2)                                 | 72.3(10.2)                                   |
| Krainc                  | USA          | European        | 59          | 16           | 75           | 25.4%            | 81.2%               | 64.7(10.7)                                | 61.4(11.7)                                   |
| Mellick                 | Australia    | European        | 480         | 508          | 988          | 36.0%            | 54.7%               | 68.3(9.3)                                 | 66.9(9.6)                                    |
| Pchelina                | Russia       | European        | 15          | 5            | 20           | 46.7%            | 80%                 | 60.7(6.4)                                 | 59.8(20.0)                                   |
| Puschmann               | Sweden       | European        | 110         | 105          | 215          | 37.3%            | 70.5%               | 68.8(10.6)                                | 66.7(8.9)                                    |
| Rogaeva                 | Canada       | European        | 215         | 153          | 368          | 34.0%            | 62.1%               | 63.6(12.4)                                | 73.8(8.6)                                    |
| Stefanis                | Greece       | European        | 242         | 181          | 423          | 38.4%            | 64.1%               | 67.1(13.5)                                | 67.0(9.6)                                    |
| Valente                 | Italy        | European        | 326         | 54           | 380          | 37.7%            | 61.1%               | 67.0(12.1)                                | 78.4(9.6)                                    |
| Wirdefeldt              | Sweden       | European        | 147         | 176          | 323          | 44.2%            | 54.5%               | 72.2(9.3)                                 | 73.5(9.7)                                    |
| Zimprich                | Austria      | European        | 598         | 184          | 782          | 36.6%            | 59.2%               | 66.8(11.3)                                | NA                                           |
| Kruger                  | Luxembourg   | European        | 333         | 360          | 693          | 32.7%            | 44.2%               | 67.4(11.2)                                | 58.1(11.9)                                   |
| <b>TOTAL</b>            | -            | <b>European</b> | <b>8968</b> | <b>7598</b>  | <b>16566</b> |                  |                     |                                           |                                              |

**Supplementary Table 3.** Demographic and clinical characteristics of the AMP-PD cohort.

| Study        | Cases (N)   | Controls (N) | Total (N)   | Female cases (%) | Female control (%) | Case age at onset (mean, SD in years) | Control age at last exam (mean, SD in years) |
|--------------|-------------|--------------|-------------|------------------|--------------------|---------------------------------------|----------------------------------------------|
| BIOFIND      | 75          | 56           | 131         | 38.7             | 48.2               | 67.5(6.2)                             | 65.4(7.2)                                    |
| HBS          | 524         | 392          | 916         | 36.3             | 64.0               | 61.5(10.6)                            | 68.5(10.3)                                   |
| LBD          | -           | 1759         | 1759        | -                | 49.5               | -                                     | 71.9(13.5)                                   |
| SURE-PD3     | 227         | -            | 227         | 49.3             | -                  | 62.3(9.5)                             | -                                            |
| PDBP         | 767         | 437          | 1204        | 35.6             | 55.1               | 59.6(10.6)                            | 62.8(10.8)                                   |
| PPMI         | 381         | 173          | 554         | 35.7             | 34.1               | 62.0(9.6)                             | 61.0(10.4)                                   |
| STEADY-PD3   | 274         | -            | 274         | 30.7             | -                  | 62.7(9.2)                             | -                                            |
| <b>TOTAL</b> | <b>2248</b> | <b>2817</b>  | <b>5065</b> |                  |                    |                                       |                                              |

NA: Not Applicable

**Supplementary Table 4.** PD cases and controls in each quantile of polygenic risk scores per cohort.

| Quantiles    | IPDGC       |             | COURAGE-PD  |             | UKBB        |            | AMP-PD     |            |
|--------------|-------------|-------------|-------------|-------------|-------------|------------|------------|------------|
|              | Controls    | Cases       | Controls    | Cases       | Controls    | Cases      | Controls   | Cases      |
| 1 (0 - 25%)  | 2353        | 926         | 1900        | 1520        | 3575        | 507        | 704        | 389        |
| 2 (26 - 50%) | 2353        | 1396        | 1899        | 1961        | 3575        | 606        | 704        | 475        |
| 3 (51- 75%)  | 2353        | 1869        | 1899        | 2384        | 3575        | 678        | 704        | 585        |
| 4 (76- 100%) | <b>2353</b> | <b>3011</b> | <b>1900</b> | <b>3102</b> | <b>3576</b> | <b>847</b> | <b>705</b> | <b>798</b> |
| Total        | 9412        | 7204        | 7598        | 8968        | 14301       | 2639       | 2817       | 2248       |

**Supplementary Table 5.** Meta-GWAS summary statistics for the sub-top loci associated with PD resilience.

| SNP        | CHR | BP        | Nearest Gene     | Variant type | Effect allele | Other allele | Frequency | Beta (SE)     | P value  | I <sup>2</sup> | Beta(SE) in Risk GWAS | P value in Risk GWAS |
|------------|-----|-----------|------------------|--------------|---------------|--------------|-----------|---------------|----------|----------------|-----------------------|----------------------|
| rs62325099 | 4   | 190552831 | <i>LINC01262</i> | Intergenic   | T             | C            | 0.569     | -0.328(0.061) | 1.03e-07 | NA             | 0.089(0.069)          | 0.206                |
| rs2652202  | 5   | 77095148  | <i>TBCA</i>      | Intergenic   | T             | C            | 0.645     | 0.127(0.024)  | 1.64e-07 | 0              | -0.023(0.022)         | 0.303                |
| rs12245509 | 10  | 91752990  | <i>LINC01375</i> | Intergenic   | A             | G            | 0.940     | -0.248(0.049) | 5.21e-07 | 0              | 0.016(0.045)          | 0.721                |
| rs292289   | 18  | 5198809   | <i>C18orf42</i>  | Intergenic   | C             | A            | 0.144     | -0.301(0.056) | 9.85e-08 | NA             | -0.020(0.043)         | 0.641                |

SNP: single nucleotide polymorphism, CHR: chromosome, BP: base pair, SE: standard error. NA: not applicable. rs62325099 and rs292289 were only present in the discovery dataset (IPDGC). Risk GWAS means the Mike Nalls *et al.* 2019 PD GWAS.

**Supplementary Table 6.** Pearson correlation between risk and resilience scores in four groups of genetic cohorts.

| Cohort     | Group             | Pearson's r | 95%CI          | P               |
|------------|-------------------|-------------|----------------|-----------------|
| IPDGC      | Control           | 0.132       | 0.111, 0.151   | <b>2.20E-16</b> |
| IPDGC      | PD                | -0.092      | -0.115, -0.069 | <b>2.20E-16</b> |
| IPDGC      | Resilient-control | -0.027      | -0.100, 0.0457 | 0.464           |
| IPDGC      | Risk-matching-PD  | -0.001      | -0.067, 0.065  | 0.970           |
| COURAGE-PD | Control           | 0.022       | -0.001, 0.044  | 0.058           |
| COURAGE-PD | PD                | -0.013      | -0.033, -0.008 | 0.226           |
| COURAGE-PD | Resilient-control | 0.005       | -0.040, 0.050  | 0.823           |
| COURAGE-PD | risk-matching-PD  | -0.021      | -0.057, -0.014 | 0.233           |
| AMP-PD     | Control           | 0.0004      | -0.036, 0.037  | 0.982           |
| AMP-PD     | PD                | -0.004      | -0.045, 0.037  | 0.843           |
| AMP-PD     | Resilient-control | -0.028      | -0.102, 0.045  | 0.451           |
| AMP-PD     | Risk-matching-PD  | -0.018      | -0.087, 0.052  | 0.615           |
| UKBB       | Control           | 0.006       | -0.010, 0.022  | 0.471           |
| UKBB       | PD                | -0.012      | -0.051, 0.026  | 0.523           |
| UKBB       | Resilient-control | 0.009       | -0.023, 0.042  | 0.571           |
| UKBB       | Risk-matching-PD  | -0.011      | -0.078, 0.056  | 0.745           |

Significant values are highlighted in bold.

**Supplementary Table 7.** Top ten ranked pathways associated with PD resilience.

| Gene Set                                                               | N Genes | Beta  | Beta STD | SE    | P value  | Pbon         |
|------------------------------------------------------------------------|---------|-------|----------|-------|----------|--------------|
| GO_bp:go_histone_h3_k9_dimethylation                                   | 5       | 1.370 | 0.024    | 0.292 | 1.36e-06 | <b>0.021</b> |
| Curated_gene_sets:burton_adipogenesis_7                                | 40      | 0.582 | 0.028    | 0.137 | 1.16e-05 | 0.18         |
| GO_mf:go_selenium_binding                                              | 7       | 1.446 | 0.026    | 0.326 | 5.25e-05 | 0.81         |
| GO_cc:go_vcb_complex                                                   | 6       | 1.500 | 0.028    | 0.390 | 5.98e-05 | 0.92         |
| Curated_gene_sets:davicioni_pax_foxo1_signature_in_arms_up             | 48      | 0.473 | 0.025    | 0.130 | 0.000128 | 1            |
| GO_bp:go_protein_localization_to_membrane                              | 515     | 0.128 | 0.022    | 0.036 | 0.000169 | 1            |
| GO_mf:go_calcium_channel_regulator_activity                            | 45      | 0.444 | 0.023    | 0.126 | 0.000214 | 1            |
| GO_bp:go_positive_regulation_of_voltage_gated_calcium_channel_activity | 12      | 0.812 | 0.022    | 0.233 | 0.000242 | 1            |
| GO_cc:go_microbody_membrane                                            | 53      | 0.336 | 0.019    | 0.097 | 0.000260 | 1            |
| Curated_gene_sets:torchia_targets_of_ewsr1_fli1_fusion_dn              | 268     | 0.183 | 0.023    | 0.053 | 0.000290 | 1            |

MAGMA gene-set analysis is performed for curated gene sets and gene ontology (GO) terms obtained from MsigDB. GO\_bp: GO biological process, GO\_mf: GO molecular function, GO\_cc: GO cellular component, N Genes: the number of genes in the data that was in the set, BETA: the regression coefficient of the variable, BETA STD: the semi-standardized regression coefficient, corresponding to the predicted change in Z-value given a change of one standard deviation in the predictor gene set/gene covariate (i.e., BETA divided by the variable's standard deviation), SE: the standard error of the regression coefficient, P<sub>bon</sub>: Bonferroni adjusted p-value.

**Supplementary Figure 1.** Density plots displaying genetic risk profiling for PD cases and controls.

**A. IPDGC**

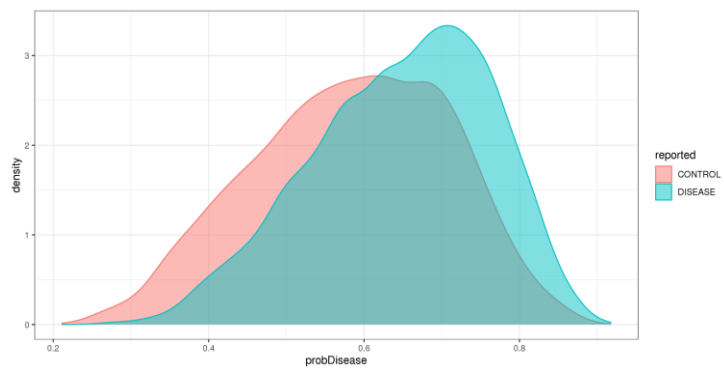

**B. COURAGE-PD**

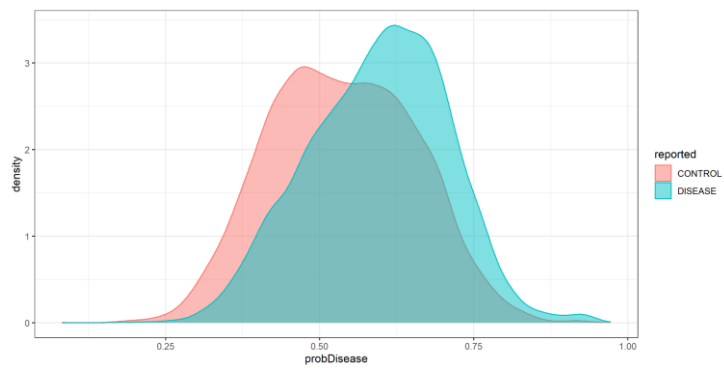

**C. UKBB**

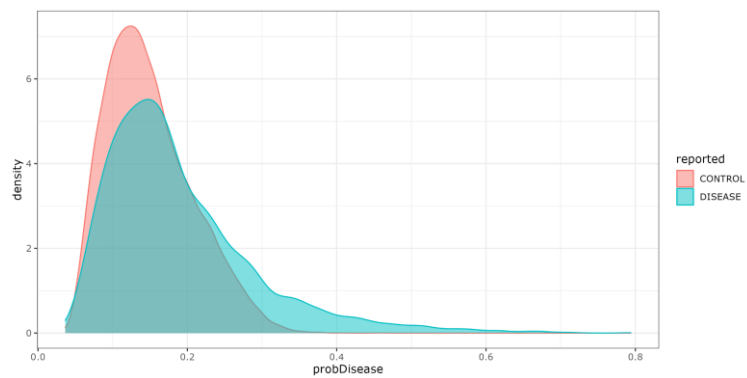

**D. AMP-PD**

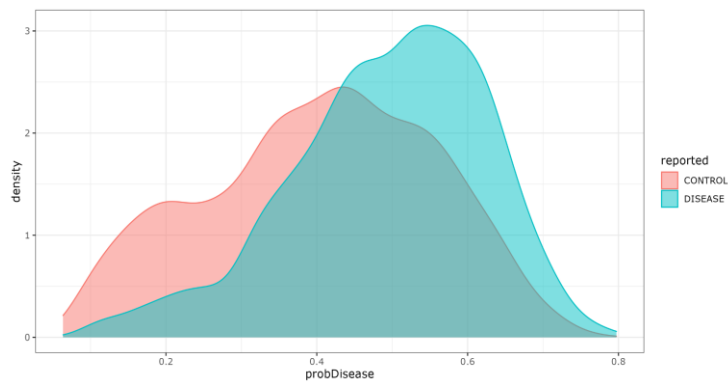

**Supplementary Figure 2.** Quantile-quantile (QQ) plot showing the distribution of p-values from the genome-wide association study meta-analysis of resilience to PD (grey dots) compared to a theoretical distribution of p-values for an equivalent number of variants (red dashed line).

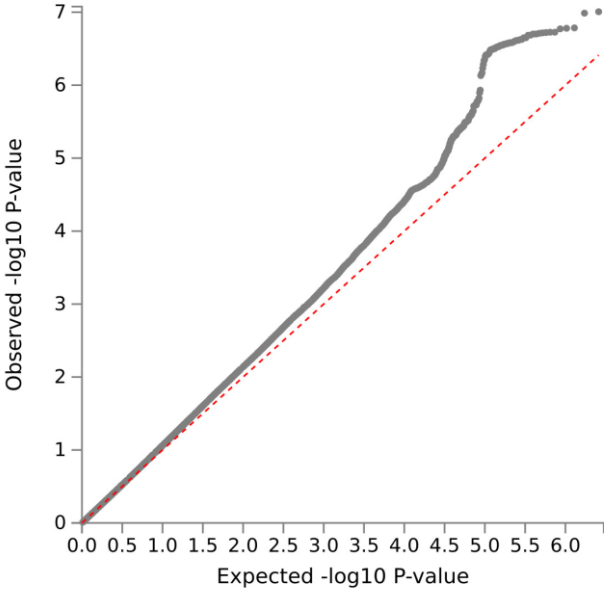

### Supplementary Figure 3. Power calculations at meta-GWAS sample size.

#### A. Top-25% of the data

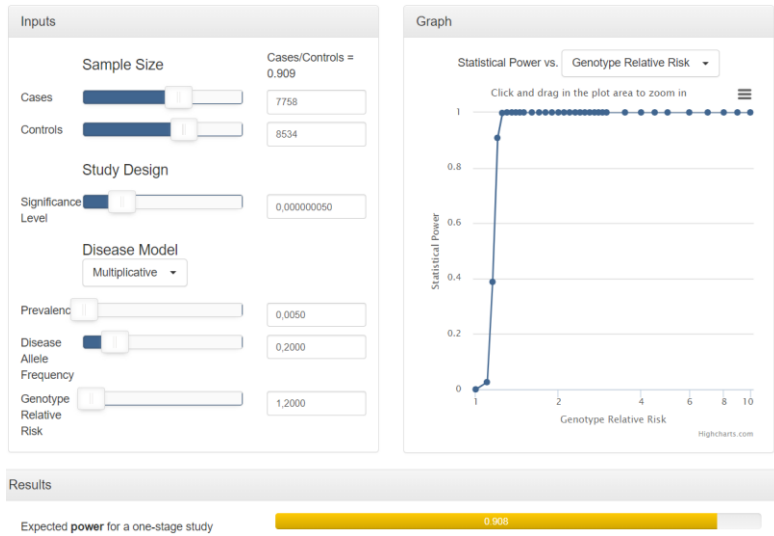

#### B. Top-10% of the data

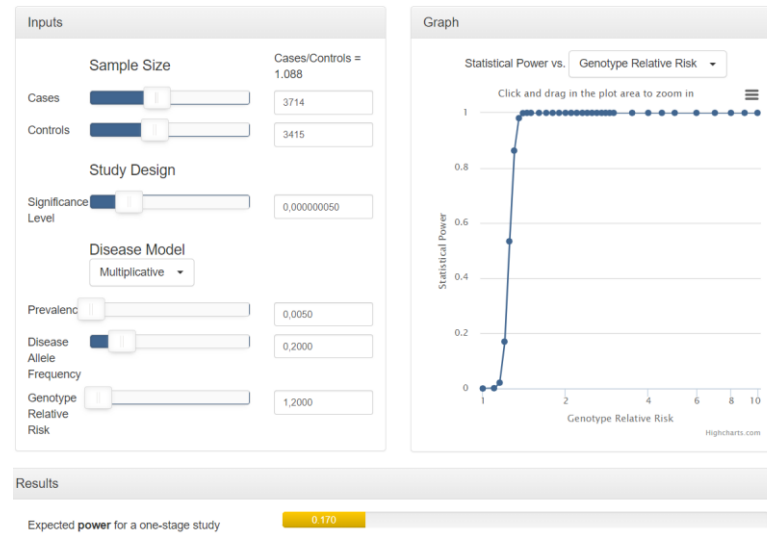



Supplementary Figure 4. Gene-based MAGMA analysis.

A

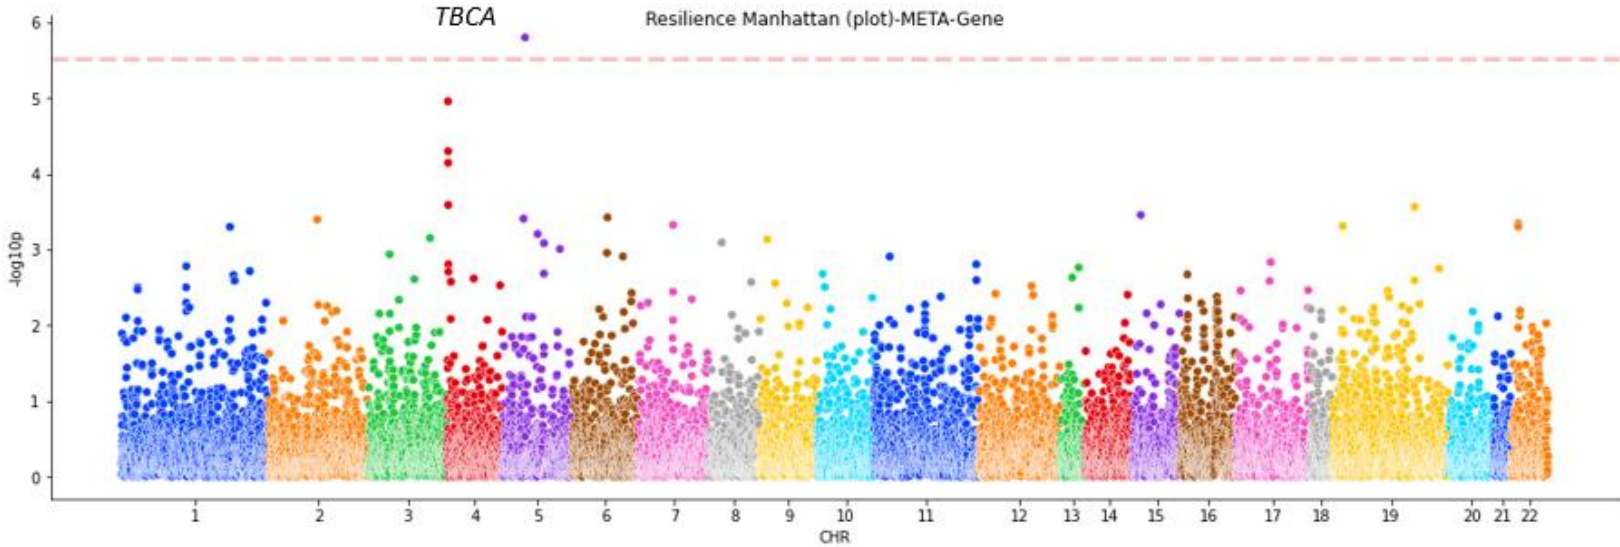

**B**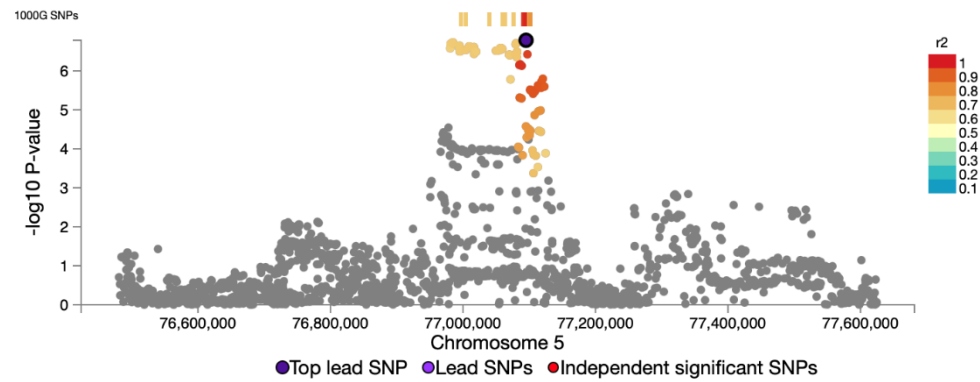**C**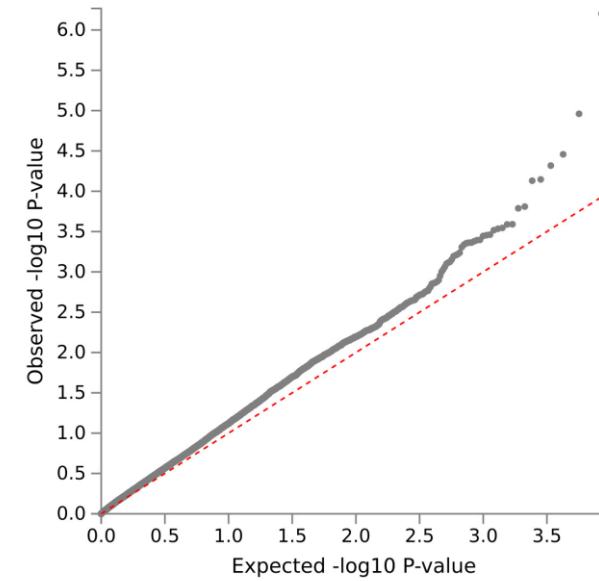

A) Gene-based Manhattan plot. B) Locus zoom plot of the TBCA region nominated through MAGMA gene-based analyses. Each SNP is color-coded based on the highest  $r^2$  to one of the independent significant SNPs if that is greater or equal to the user-defined threshold. Other SNPs (i.e. below the user-defined  $r^2$ ) are colored in grey. The top lead SNPs in genomic risk loci, lead SNPs, and independent significant SNPs are circled in black and colored in dark-purple, purple and red, respectively. C) Quantile-quantile (QQ) plot showing the distribution of p-values from MAGMA gene-based GWAS of resilience to PD (grey dots) compared to a theoretical distribution of p-values for an equivalent number of variants (red dashed line).

**Supplementary Figure 5.** Polygenic resilience score of resilient controls and risk-matching cases.

**A. IPDGC**

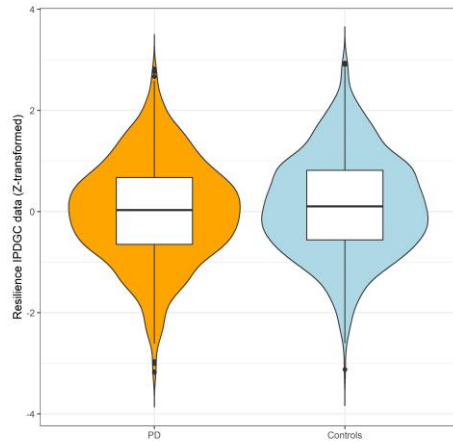

**B. COURAGE-PD**

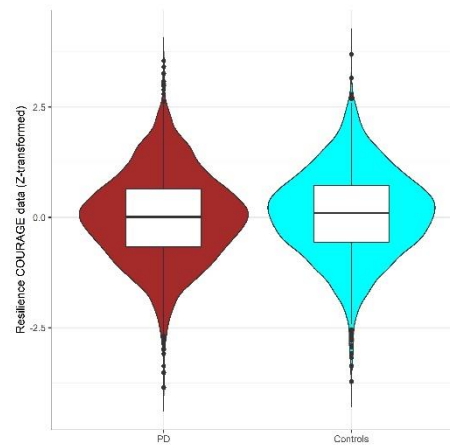

**C. UKBB**

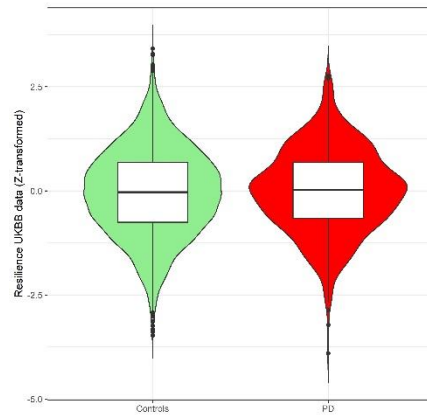

**D. AMP-PD**

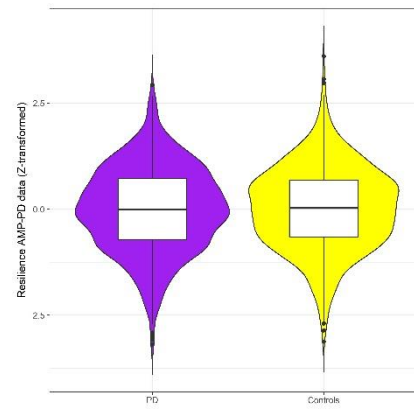

**Supplementary Figure 6.** Correlation between risk and resilience scores in the discovery IPDGC cohort, including 7,204 PD cases and 9,412 controls.

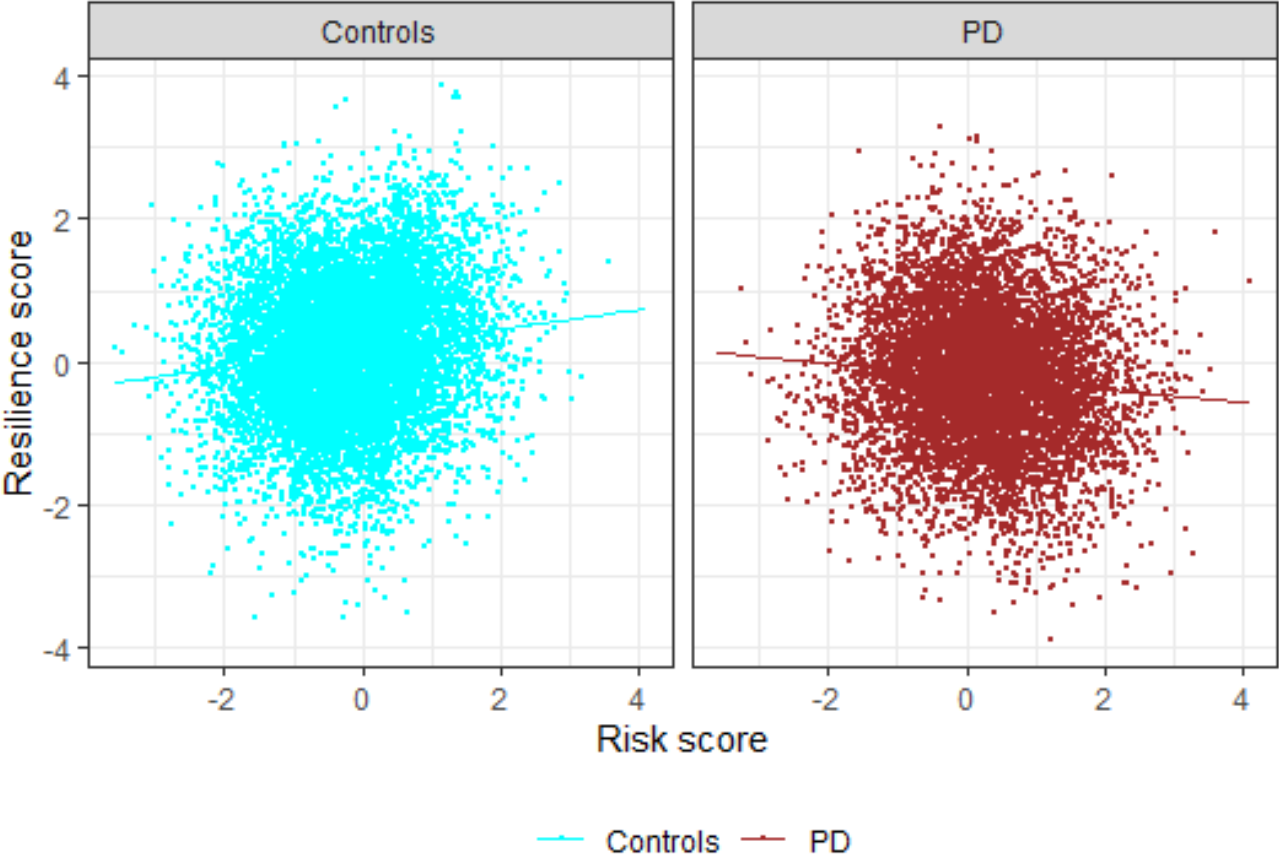

**Supplementary Figure 7.** Tissue specific expression enrichment analyses for PD resilience variants.

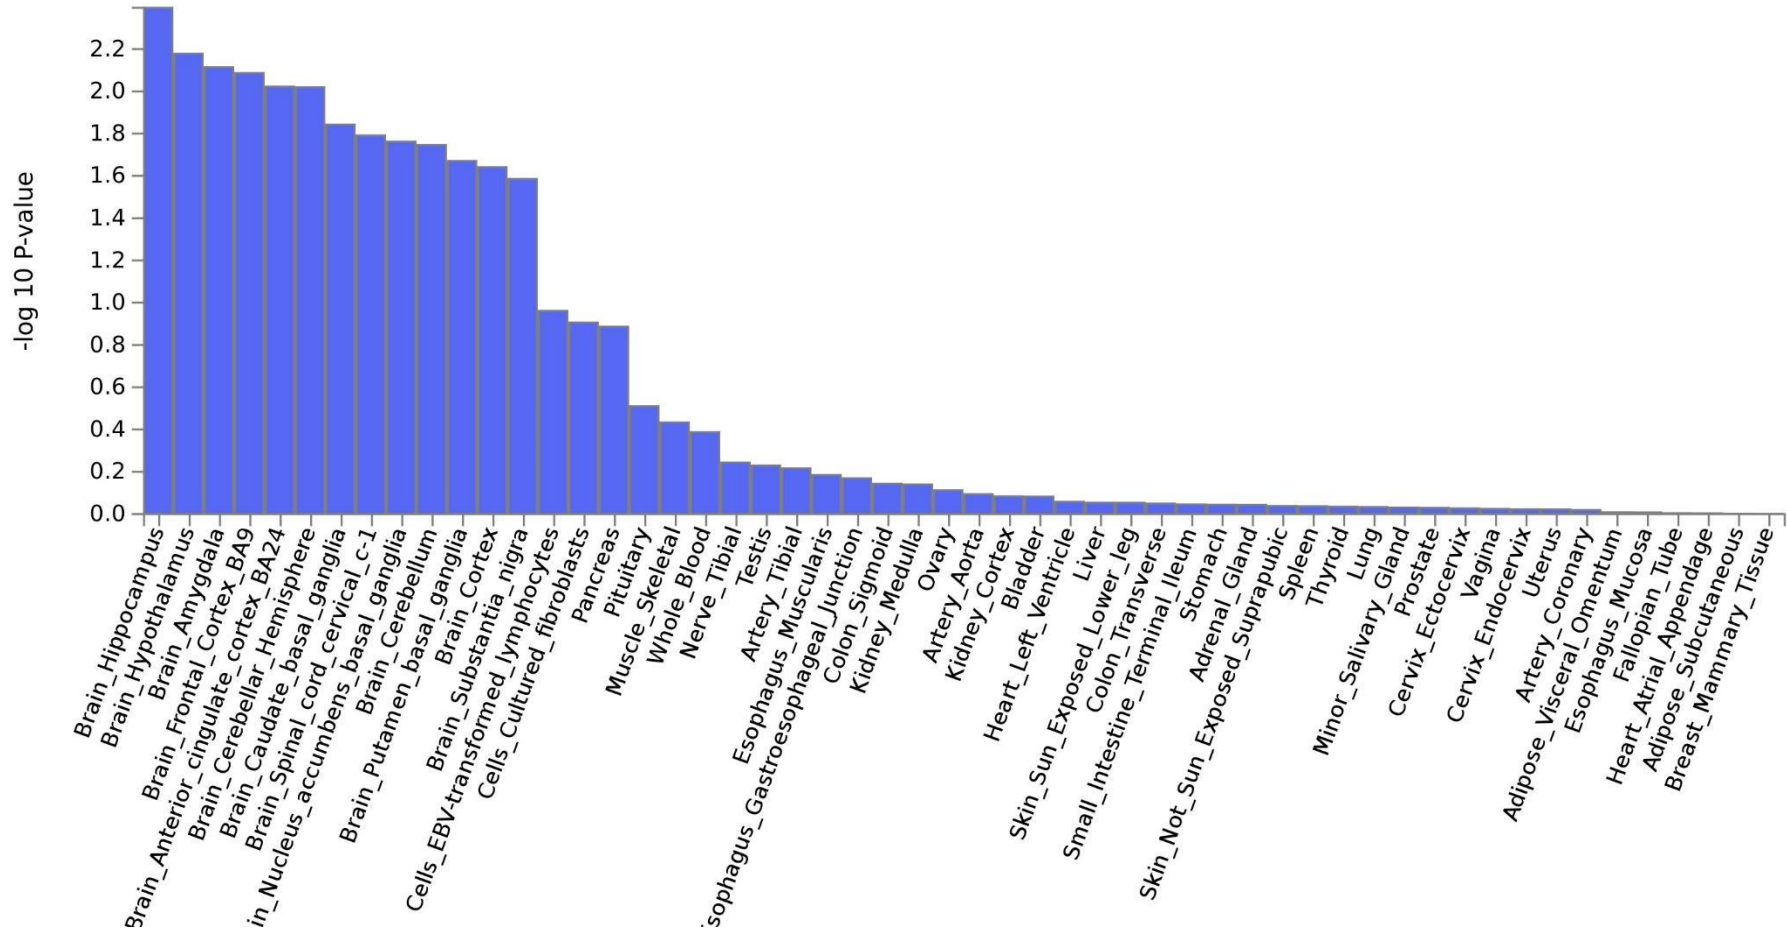



## **COURAGE-PD consortium members and affiliations:**

**Australia:** Georges D. Mellick (Griffith Institute for Drug Discovery, Griffith University, Nathan, Queensland, Australia).

**Austria:** Alexander Zimprich (Department of Neurology, Medical University of Vienna, Austria), Thomas Brücke (Verein zur Förderung der wissenschaftlichen Forschung im, Wilhelminenspital (FWFW)) Verein zur Förderung der wissenschaftlichen Forschung im, Wilhelminenspital (FWFW), Walter Pirker (Department of Neurology, Wilhelminenspital, Austria).

**Canada:** Anthony E Lang (Edmond J. Safra Program in Parkinson's Disease, Morton and Gloria Shulman Movement Disorders Clinic, Toronto Western Hospital, UHN, Toronto, Ontario, Canada; Division of Neurology, University of Toronto, Toronto, Ontario, Canada; Krembil Brain Institute, Toronto, Ontario, Canada), Ekaterina Rogaeva (Tanz Centre for Research in Neurodegenerative Diseases, University of Toronto, Toronto, Ontario, Canada).

**Estonia:** Pille Taba (Department of Neurology and Neurosurgery, University of Tartu, Estonia, and Tartu University Hospital, Estonia), Sulev Koks (Centre for Molecular Medicine and Innovative Therapeutics, Murdoch University, Murdoch and Perron Institute for Neurological and Translational Science, Nedlands, Western Australia, Australia), Mari Muldmaa (Department of Neurology and Neurosurgery, University of Tartu, Estonia, and North Estonian Regional Hospital, Tallinn, Estonia).

**France:** Alexis Brice (Sorbonne Université, Institut du Cerveau et de la Moelle épinière, ICM, Inserm U 1127, CNRS UMR 7225, AP-HP, Hôpital de la Pitié Salpêtrière, Paris, France), Antouria Mohamed (Université Paris-Saclay, UVSQ, Univ. Paris-Sud, Inserm, Team "Exposome, heredity, cancer and health," CESP, Villejuif, France, Berta Portugal (Université Paris-Saclay, UVSQ, Univ. Paris-Sud, Inserm, Team "Exposome, heredity, cancer and health," CESP, 94807, Villejuif, France, Eugénie Muttez (University of Lille, Inserm, CHU Lille, U1172 - LilNCog - Lille Neuroscience & Cognition, Lille, France), Claire Mulot ICRB Epigenetec, INSERM UMR-S 1138, Université Paris Descartes, France), Jean-Christophe Corvol (Sorbonne Université, Institut du Cerveau et de la Moelle épinière, ICM, Inserm U1127, AP-HP, Hôpital de la Pitié Salpêtrière, Paris, France), Marie-Christine Chartier-Harlin (University of Lille, Inserm, CHU Lille, U1172-LilNCog- Lille Neuroscience & Cognition, Lille, France), Suzanne Lesage (Sorbonne Université, Institut du Cerveau et de la Moelle épinière, ICM, Paris, France).

**Germany:** Angela B Deuschländer (Department of Neurology, Ludwig Maximilians University of Munich, Germany; Department of Neurology, Max Planck Institute of Psychiatry, Munich, Germany, Department of Neurology; Felix Bartusch (High Performance and Cloud Computing Group, IT Center (ZDV), University of Tübingen, Tübingen, Germany), Jens Krüger (High Performance and Cloud Computing Group, IT Center (ZDV), University of Tübingen, Tübingen, Germany), Julius Maximilians University of Würzburg, Würzburg, Germany; Department of Neurology and Department of Clinical Genomics, Mayo Clinic Florida, Jacksonville, FL, USA), Kathrin Brockmann (Department for Neurodegenerative Diseases, Hertie Institute for Clinical Brain Research, and German Center for Neurodegenerative Diseases [DZNE], Tübingen, Germany), Maximilian Hanussek (High Performance and Cloud Computing Group, IT Center (ZDV), University of Tübingen, Tübingen, Germany), Milena Radivojkov-Blagojevic,

Institute of Human Genetics, Helmholtz Zentrum München, Neuherberg, Germany), Peter Lichtner (Institute of Human Genetics, Helmholtz Zentrum München, Neuherberg, Germany).

**Greece:** Athina Maria Simitsi (Center of Clinical Research, Experimental Surgery and Translational Research, Biomedical Research Foundation of the Academy of Athens, Athens, Greece; 1st Department of Neurology, Eginition Hospital, Medical School, National and Kapodistrian University of Athens, Athens, Greece), Christos Koros (1st Department of Neurology, Eginition Hospital, Medical School, National and Kapodistrian University of Athens, Athens, Greece), Efthimos Dardiotis (Department of Neurology, Laboratory of Neurogenetics, University of Thessaly, University Hospital of Larissa, Larissa, Greece), Georges M Hadjigeorgiou (Department of Neurology, Medical School, University of Cyprus, Nicosia, Cyprus, and Department of Neurology, Laboratory of Neurogenetics, University of Thessaly, University Hospital of Larissa, Larissa, Greece), Geogia Xiromerisiou (Department of Neurology, Laboratory of Neurogenetics, University of Thessaly, University Hospital of Larissa, Larissa, Greece), Leonidas Stefanis (Center of Clinical Research, Experimental Surgery and Translational Research, Biomedical Research Foundation of the Academy of Athens, Athens, Greece; 1st Department of Neurology, Eginition Hospital, Medical School, National and Kapodistrian University of Athens, Athens, Greece), Marina Bozi (2nd Department of Neurology, Attikon Hospital, Medical School, National and Kapodistrian University of Athens, Athens, Greece), Matina Maniati (Center of Clinical Research, Experimental Surgery and Translational Research, Biomedical Research Foundation of the Academy of Athens, Athens, Greece).

**Italy:** Anna Zecchinelli (Parkinson Institute, Azienda Socio Sanitaria Territoriale [ASST] Gaetano Pini/CTO, Milano), Enza Maria Valente (Department of Molecular Medicine, University of Pavia, Pavia, and Neurogenetics Laboratory, Istituto di Ricovero e Cura a Carattere Scientifico [IRCCS] Mondino Foundation, Pavia, Italy), Carlo Ferrarese (Department of Neurology, San Gerardo Hospital, Milan, Center for Neuroscience, University of Milano Bicocca, Monza, Italy), Francesca Del Sorbo (Parkinson Institute, Azienda Socio Sanitaria Territoriale [ASST] Gaetano Pini/CTO, Milano), Gianni Pezzoli (Parkinson Institute, Azienda Socio Sanitaria Territoriale [ASST] Gaetano Pini/CTO, Milano), Giorgio Sacilotto (Parkinson Institute, Azienda Socio Sanitaria Territoriale [ASST] Gaetano Pini/CTO, Milano), Grazia Annesi (Institute For Biomedical Research and Innovation, National Research Council, Cosenza), Laura Brighina (Department of Neurology, San Gerardo Hospital, Milan, Center for Neuroscience, Monza, Italy), Letizia Straniero (Department of Biomedical Sciences, Humanitas University, Milan, Italy), Margherita Canesi (Parkinson Institute, Azienda Socio Sanitaria Territoriale [ASST] Gaetano Pini/CTO), Milano, Monica Gagliardi (Institute of Molecular Bioimaging and Physiology, National Research Council, Catanzaro), Michela Zina (Parkinson Institute, Azienda Socio Sanitaria Territoriale (ASST) Gaetano Pini/CTO, Milano), Micol Avenali (Department of Brain and Behavioural Sciences, University of Pavia, and Istituto di Ricovero e Cura a Carattere Scientifico [IRCCS] Mondino Foundation, Pavia, Italy), Nicoletta Meucci (Parkinson Institute, Azienda Socio Sanitaria Territoriale [ASST] Gaetano Pini/CTO, Milano), Radha Procopio (Institute of Molecular Bioimaging and Physiology National Research Council), Roberto Cilia (Parkinson Institute, Azienda Socio Sanitaria Territoriale [ASST] Gaetano Pini/CTO, Milano), Rosanna Asselta (Department of Biomedical Sciences, Humanitas University, Milan, Italy; Humanitas Clinical and Research Center, IRCCS, Milan, Italy), Simona Petrucci (Department of Clinical and Molecular Medicine, Sapienza University of Rome, and UOC Medical Genetics and Advanced Cell



Diagnostics, S. Andrea University Hospital, Rome, Italy), Stefano Duga (Department of Biomedical Sciences, Humanitas University, Milan, Italy; Humanitas Clinical and Research Center, IRCCS, Milan, Italy).

**Japan:** Aya Ikeda (Department of Neurology, Juntendo University School of Medicine, Bunkyo-ku, Tokyo, Japan), Hirotaka Matsuo (Department of Integrative Physiology and Bio-Nano Medicine, National Defense Medical College, Saitama, Japan), Hiroyo Yoshino (Research Institute for Diseases of Old Age, Graduate School of Medicine, Juntendo University, Bunkyo-ku, Tokyo, Japan, Nobutaka Hattori (Department of Neurology, Juntendo University School of Medicine, Bunkyo-ku, Tokyo, Japan), Manabu Fanayama (Research Institute for Diseases of Old Age, Graduate School of Medicine, Juntendo University, Bunkyo-ku, Tokyo, Japan), Takashi Matsushima (Department of Neurology, Juntendo University School of Medicine, Bunkyo-ku, Tokyo, Japan), Yuanzhe Li (Department of Neurology, Juntendo University School of Medicine, Bunkyo-ku, Tokyo, Japan), Yusuke Kawamura (Department of Integrative Physiology and Bio-Nano Medicine, National Defense Medical College, Saitama, Japan), Kenya Nishioka (Department of Neurology, Juntendo University School of Medicine, Bunkyo-ku, Tokyo, Japan).

**Korea:** Sun Ju Chung (Department of Neurology, Asan Medical Center, University of Ulsan College of Medicine, Seoul, South Korea), Yun Joong Kim (Department of Neurology, Yongin Severance Hospital, Yonsei University College of Medicine, South Korea).

**Luxembourg:** Pierra Kilber (Neurology, Centre Hospitalier de Luxembourg, Luxembourg, Luxembourg), Zied Landoulsi (Luxembourg Centre for Systems Biomedicine, Esch-sur-Alzette, Luxembourg).

**Netherlands:** Bart PC van de Warrenburg (Neurology, Radboud University Medical Centre, Nijmegen, The Netherlands), Bastiaan R Bloem (Neurology, Donders Institute for Brain, Cognition and Behaviour, Radboud University Medical Centre, Nijmegen, The Netherlands).

**Norway:** Jan Aasly (Department of Neurology, St Olav's Hospital and Norwegian University of Science and Technology, Trondheim), Lasse Pihlstrøm (Department of Neurology, Oslo University Hospital, Oslo, Norway), Mathias Toft (Department of Neurology, Oslo University Hospital, Oslo, Norway).

**Portugal:** Joaquim J Ferreira (Instituto de Medicina Molecular Jo~ao Lobo Antunes, Faculdade de Medicina, Universidade de Lisboa, Lisbon, Portugal; Department of Neurosciences and Mental Health, Neurology, Hospital de Santa Maria, Centro Hospitalar Universitario Lisboa Norte (CHULN), Lisbon, Portugal), Leonor Correia Guedes (Instituto de Medicina Molecular Jo~ao Lobo Antunes, Faculdade de Medicina, Universidade de Lisboa, Lisbon, Portugal; Department of Neurosciences and Mental Health, Neurology, Hospital de Santa Maria, Centro Hospitalar Universitario Lisboa Norte (CHULN), Lisbon, Portugal).

**Russia:** Sophia N Pchelina (Petersburg Nuclear Physics Institute named by B.P. Konstantinov of National Research Centre «Kurchatov Institute», St. Petersburg, 188,300, Russia; Pavlov First Saint Petersburg State Medical University, St. Petersburg, Russia; Institute of Experimental Medicine, St. Petersburg, Russia).

**South Africa:** Jonathan Carr (Division of Neurology, Department of Medicine, Faculty of Medicine and Health Sciences, Stellenbosch University, South Africa), Soraya Barden (Division of Molecular Biology and Human Genetics, Department of Biomedical Sciences, Faculty of Medicine and Health Sciences, Stellenbosch University, South Africa).

**Spain:** Eduardo Tolosa (Parkinson and Movement Disorders Unit, Neurology Service, Hospital Clinic, Department of Neurology, Universitat de Barcelona and Centro de Investigacion Biomedica en Red sobre Enfermedades Neurodegenerativas [CIBERNED], Instituto de Salud Carlos III, Barcelona), Mario Ezquerra (Lab of Parkinson Disease and Other Neurodegenerative Movement Disorders, Institut d'Investigacions Biomèdiques August Pi i Sunyer [IDIBAPS], Institut de Neurociències, Universitat de Barcelona, Barcelona, Catalonia), Monica Diez-Fairen (Fundació per la Recerca Biomèdica i Social Mútua Terrassa, Terrassa, Barcelona, Spain; Movement Disorders Unit, Department of Neurology, Hospital Universitari Mutua de Terrassa, Terrassa, Barcelona, Spain), Pau Pastor (Fundació per la Recerca Biomèdica I Social Mútua Terrassa, Terrassa, Barcelona, Spain; Movement Disorders Unit, Department of Neurology, Hospital Universitari Mutua de Terrassa, Terrassa, Barcelona, Spain), Rubén Fernández-Santiago (Lab of Parkinson Disease and Other Neurodegenerative Movement Disorders, Institut d'Investigacions Biomèdiques August Pi i Sunyer [IDIBAPS], Institut de Neurociències, Universitat de Barcelona, Barcelona, Catalonia).

**Sweden:** Andrea C. Belin (Department of Neuroscience, Karolinska Institutet, Stockholm, Sweden), Andrea Puschmann (Lund University, Skåne University Hospital, Department of Clinical Sciences Lund, Neurology, Lund, Sweden), Clara Hellberg (Lund University, Skåne University Hospital, Department of Clinical Sciences Lund, Neurology, Lund, Sweden), Caroline Ran (Department of Neuroscience, Karolinska Institutet, Stockholm, Sweden), Karin Wirdefeldt (Department of Medical Epidemiology and Biostatistics, Karolinska Institutet, Stockholm, and Department of Clinical Neuroscience, Karolinska Institutet, Stockholm, Sweden), Nancy L Pederson (Department of Medical Epidemiology and Biostatistics, Karolinska Institutet, Stockholm).

**UK:** Carl E Clarke (University of Birmingham and Sandwell and West Birmingham Hospitals NHS Trust, United Kingdom), Huw R Morris (Department of Clinical and Movement Neurosciences, UCL Queen Square Institute of Neurology, University College London, London, UK), Karen E Morrison (Faculty of Medicine, Health and Life Sciences, Queens University, Belfast, United Kingdom), Manuela Tan (Tanz Centre for Research in Neurodegenerative Diseases, University of Toronto, Toronto, Ontario, Canada), Nicholas Wood (University College London (UCL) Genetics Institute and Department of Molecular Neuroscience, UCL Institute of Neurology, London, United Kingdom).

**United States:** Dena G Hernandez (Molecular Genetics Section, Laboratory of Neurogenetics, NIA, NIH, Bethesda, MD), Dimitri Krainc (Department of Neurology, Northwestern University Feinberg School of Medicine, Chicago, IL), Connor Edsall (Molecular Genetics Section, Laboratory of Neurogenetics, NIA, NIH, Bethesda, MD), Lena F. Burbulla (Department of Neurology, Northwestern University Feinberg School of Medicine, Chicago, IL), Matt J. Farrer (Centre for Applied Neurogenetics, Department of Medical Genetics, University of British Columbia, Vancouver, British Columbia, Canada), Andy Singleton (Molecular Genetics Section, Laboratory of Neurogenetics, NIA, NIH, Bethesda, MD).

## **AMP-PD acknowledgement:**

We would like to thank all members of the Comprehensive Unbiased Risk factor Assessment for Genetics and Environment in Parkinson's Disease (COURAGE-PD) Consortium. The COURAGE-PD consortium is conducted under a partnership agreement between 35 studies. The COURAGE-PD consortium is supported by the EU Joint Program for Neurodegenerative Disease research (JPND; <https://www.neurodegenerationresearch.eu/initiatives/annual-calls-for-proposals/closed-calls/risk-factors-2012/risk-factor-call-results/courage-pd/>, grant 01ED1406).

We would like to thank AMP-PD for the publicly available whole-genome sequencing data. Clinical data and biosamples used in preparation of this article were obtained from the Michael J. Fox Foundation (MJFF) and National Institutes of Neurological Disorders and Stroke (NINDS) BioFIND study, Harvard Biomarkers Study (HBS), the NIA International Lewy Body Dementia Genetics Consortium Genome Sequencing in Lewy body dementia case-control cohort (LBD), the MJFF LRRK2 Cohort Consortium (LCC), the NINDS Parkinson's disease Biomarkers Program (PDBP), MJFF Parkinson's Progression Marker Initiative (PPMI), and the NINDS Study of Isradipine as a Disease Modifying Agent in Subjects With Early Parkinson Disease, Phase 3 (STEADY-PD3). BioFIND is sponsored by The Michael J. Fox Foundation for Parkinson's Research (MJFF) with support from the National Institute for Neurological Disorders and Stroke (NINDS). The BioFIND Investigators have not participated in reviewing the data analysis or content of the manuscript. For up-to-date information on the study, visit [michaeljfox.org/news/biofind](http://michaeljfox.org/news/biofind). Genome sequence data for the Lewy body dementia case-control cohort were generated at the Intramural Research Program of the U.S. National Institutes of Health. The study was supported in part by the National Institute on Aging (program #: 1ZIAAG000935) and the National Institute of Neurological Disorders and Stroke (program #: 1ZIAN003154). The Harvard NeuroDiscovery Biomarker Study (HBS) is a collaboration of HBS investigators [full list of HBS investigator found at <https://www.bwhparkinsoncenter.org/biobank/> and funded through philanthropy and NIH and Non-NIH funding sources. The HBS Investigators have not participated in reviewing the data analysis or content of the manuscript. The LRRK2 Cohort Consortium is coordinated and funded by The Michael J. Fox Foundation for Parkinson's Research. Data used in preparation of this article were obtained from the MJFF-sponsored LRRK2 Cohort Consortium (LCC). The LCC Investigators have not participated in reviewing the data analysis or content of the manuscript. For up-to-date information on the study, visit <https://www.michaeljfox.org/biospecimens>. PPMI – a public-private partnership – is funded by the Michael J. Fox Foundation for Parkinson's Research and funding partners, including [list the full names of all of the PPMI funding partners found at [www.ppmi-info.org/fundingpartners](http://www.ppmi-info.org/fundingpartners). The PPMI Investigators have not participated in reviewing the data analysis or content of the manuscript. For up-to-date information on the study, visit [www.ppmi-info.org](http://www.ppmi-info.org). Parkinson's Disease Biomarker Program (PDBP) consortium is supported by the National Institute of Neurological Disorders and Stroke (NINDS) at the National Institutes of Health. A full list of PDBP investigators can be found at <https://pdbp.ninds.nih.gov/policy>. The PDBP Investigators have not participated in reviewing the data analysis or content of the manuscript. The Study of Isradipine as a Disease Modifying Agent in Subjects With Early Parkinson Disease, Phase 3 (STEADY-PD3) is funded by the National Institute of Neurological Disorders and Stroke (NINDS) at the National Institutes of Health with support from the Michael J. Fox Foundation and the Parkinson Study Group. For additional study information, visit

<https://clinicaltrials.gov/ct2/show/study/NCT02168842>. The STEADY-PD3 investigators have not participated in reviewing the data analysis or content of the manuscript. The Study of Urate Elevation in Parkinson's Disease, Phase 3 (SURE-PD3) is funded by the National Institute of Neurological Disorders and Stroke (NINDS) at the National Institutes of Health with support from the Michael J. Fox Foundation and the Parkinson Study Group. For additional study information, visit <https://clinicaltrials.gov/ct2/show/NCT02642393>. The SURE-PD3 investigators have not participated in reviewing the data analysis or content of the manuscript. The LRRK2 Cohort Consortium (LCC) was created to assemble and study groups of people with and without Parkinson's disease who carry mutations in the LRRK2 gene. The LRRK2 Cohort Consortium is coordinated and funded by The Michael J. Fox Foundation for Parkinson's Research. The investigators within the LCC contributed to the design and implementation of the LCC and/or provided data and/or collected biospecimens, but did not necessarily participate in the analysis or writing of this report. The full list of LCC investigators can be found at [www.michaeljfox.org/lccinvestigators](http://www.michaeljfox.org/lccinvestigators). This work utilized the computational resources of the NIH HPC Biowulf cluster (<http://hpc.nih.gov>).
